# Supplementary material
Source: Springer Nature journal article supplement (https://www.springermedizin.de/resource/supplementary/12877_2014_1082_MOESM1_ESM.pdf/9440968)
Supplement: MOESM1 [file 9440968]

**S-SCEAM should not be administered without consulting the guidelines for use. Guidelines for use and information on scoring procedures can be obtained from the first author by request.**

# S-SCEAM

Äldreboende: \_\_\_\_\_

Datum: \_\_\_\_\_

Bedömare: \_\_\_\_\_

| DELFRÅGA | Ja | Nej | Ej<br>tillämpligt |
|----------|----|-----|-------------------|
|----------|----|-----|-------------------|

## Externt/entré

|                                                                                                                                 |                       |                       |                       |
|---------------------------------------------------------------------------------------------------------------------------------|-----------------------|-----------------------|-----------------------|
| 1. Är äldreboendet integrerat i ett vanligt bostadsområde?                                                                      | <input type="radio"/> | <input type="radio"/> | <input type="radio"/> |
| 2. Finns det serviceinrättningar och butiker i närheten?                                                                        | <input type="radio"/> | <input type="radio"/> | <input type="radio"/> |
| 3. Ligger äldreboendet i närheten av kollektivtrafik?                                                                           | <input type="radio"/> | <input type="radio"/> | <input type="radio"/> |
| 4. Ligger äldreboendet i ett område där människor rör sig dagligen?                                                             | <input type="radio"/> | <input type="radio"/> | <input type="radio"/> |
| 5. Finns det natur eller trädgård i närheten?                                                                                   | <input type="radio"/> | <input type="radio"/> | <input type="radio"/> |
| 6. Finns det besöksparkering?                                                                                                   | <input type="radio"/> | <input type="radio"/> | <input type="radio"/> |
| 7. Finns det reserverad parkering för rörelsehindrade inom 25 meters gångavstånd från huvudentrén?                              | <input type="radio"/> | <input type="radio"/> | <input type="radio"/> |
| 8. Är gångvägen från bilparkeringen säker? (så att boende eller besökare inte behöver korsa parkeringen där bilar är i rörelse) | <input type="radio"/> | <input type="radio"/> | <input type="radio"/> |
| 9. Är det säkert att nå byggnaden till fots? (säkra övergångsställen, gångväg som är avskild från bilväg)                       | <input type="radio"/> | <input type="radio"/> | <input type="radio"/> |

## Externt/entré

|                                                                                                                                |                       |                       |                       |
|--------------------------------------------------------------------------------------------------------------------------------|-----------------------|-----------------------|-----------------------|
| 10. Finns det belysning som anger stigar, ramper, trappsteg?                                                                   | <input type="radio"/> | <input type="radio"/> | <input type="radio"/> |
| 11. Finns det rörelsestyrd belysning som tänds då någon närmar sig byggnaden?                                                  | <input type="radio"/> | <input type="radio"/> | <input type="radio"/> |
| 12. Är huvudentrén utformad så att den är lätt att hitta?                                                                      | <input type="radio"/> | <input type="radio"/> | <input type="radio"/> |
| 13. Finns det någon belysning nära huvudentrén?                                                                                | <input type="radio"/> | <input type="radio"/> | <input type="radio"/> |
| 14. Är huvudentrén klimat- och väderskyddad?                                                                                   | <input type="radio"/> | <input type="radio"/> | <input type="radio"/> |
| 15. Finns det klimat- och väderskyddade sittplatser utomhus i direkt anslutning till huvudentrén?                              | <input type="radio"/> | <input type="radio"/> | <input type="radio"/> |
| 16. Är huvudentrén utformad så att det är möjligt att lämna/hämta personer eller personliga tillhörigheter?                    | <input type="radio"/> | <input type="radio"/> | <input type="radio"/> |
| 17. Är huvudentrén utformad för personer med nedsatt rörelse- eller orienteringsförmåga?                                       | <input type="radio"/> | <input type="radio"/> | <input type="radio"/> |
| 18. Finns det ringklocka, porttelefon eller instruktioner om hur man kommer in för att välkomna besökare?                      | <input type="radio"/> | <input type="radio"/> | <input type="radio"/> |
| 19. Finns det minst två sittplatser innanför huvudentrén?                                                                      | <input type="radio"/> | <input type="radio"/> | <input type="radio"/> |
| 20. Finns det någon reception i huvudentrén?                                                                                   | <input type="radio"/> | <input type="radio"/> | <input type="radio"/> |
| 21. Finns det informationstavlor för besökare?                                                                                 | <input type="radio"/> | <input type="radio"/> | <input type="radio"/> |
| 22. Är trygghets/säkerhetsanordningar diskret integrerade i miljön? (t ex störande anslagstavlor, blinkande larm, kala lysrör) | <input type="radio"/> | <input type="radio"/> | <input type="radio"/> |

## Vardagsrum

|                                                                                                                                                                          |                       |                       |                       |
|--------------------------------------------------------------------------------------------------------------------------------------------------------------------------|-----------------------|-----------------------|-----------------------|
| 23. Kan man överblicka hela vardagsrummet?                                                                                                                               | <input type="radio"/> | <input type="radio"/> | <input type="radio"/> |
| 24. Kan personer som har andra ärenden än att besöka anhöriga, nå utrymmen utan att behöva passera igenom vardagsrummet? (t ex fastighetsskötare, brevbärare, studenter) | <input type="radio"/> | <input type="radio"/> | <input type="radio"/> |
| 25. Kan boende och personal nå andra utrymmen utan att behöva passera igenom vardagsrummet?                                                                              | <input type="radio"/> | <input type="radio"/> | <input type="radio"/> |
| 26. Kan man välja mellan att vara i olika vardagsrum eller liknande rum? (t ex alkov)                                                                                    | <input type="radio"/> | <input type="radio"/> | <input type="radio"/> |
| 27. Är trygghets/säkerhetsanordningar diskret integrerade i miljön? (t ex störande anslagstavlor, blinkande larm, kala lysrör)                                           | <input type="radio"/> | <input type="radio"/> | <input type="radio"/> |
| 28. Är vardagsrummet utformat så att det ger en karaktär av bostad och hem? (material, storlek, form)                                                                    | <input type="radio"/> | <input type="radio"/> | <input type="radio"/> |
| 29. Är ljussättningen i vardagsrummet utformad på ett sätt som ger en karaktär av bostad och hem?                                                                        | <input type="radio"/> | <input type="radio"/> | <input type="radio"/> |
| 30. Är sittplatserna utformade på ett sätt som ger en karaktär av bostad och hem? (medicinteknisk utrustning och konstgjorda material är diskreta)                       | <input type="radio"/> | <input type="radio"/> | <input type="radio"/> |
| 31. Finns det möjlighet att välja typ och höjd på stolar och soffor?                                                                                                     | <input type="radio"/> | <input type="radio"/> | <input type="radio"/> |
| 32. Är vardagsrummet utformat så att det finns plats för personliga föremål? (t ex föremål på vägghyllor, tavlor, speglar, golvföremål)                                  | <input type="radio"/> | <input type="radio"/> | <input type="radio"/> |
| 33. Finns det en variation av material som stimulerar de boende? (t ex trä, tyg)                                                                                         | <input type="radio"/> | <input type="radio"/> | <input type="radio"/> |
| 34. Är sittplatserna säkra och stödjande för sköra äldre personer? (t ex inga vassa ytor, stabila armstöd, robusta ben, låg sitthöjd)                                    | <input type="radio"/> | <input type="radio"/> | <input type="radio"/> |
| 35. Är golven halksäkra? (viss strävhet, jämn yta utan springor, material med liknande friktion intill varandra)                                                         | <input type="radio"/> | <input type="radio"/> | <input type="radio"/> |

## Vardagsrum

|                                                                                                                                                                                               |                       |                       |                       |
|-----------------------------------------------------------------------------------------------------------------------------------------------------------------------------------------------|-----------------------|-----------------------|-----------------------|
| 36. Är vardagsrummet säkert utformat för sköra äldre personer? (t ex skydd på varma/vassa/glasade ytor, en golvnivå eller tydlig övergång från en nivå till en annan, fönster med fönsterlås) | <input type="radio"/> | <input type="radio"/> | <input type="radio"/> |
| 37. Är vardagsrummet tillgängligt för personer med funktionsnedsättningar?                                                                                                                    | <input type="radio"/> | <input type="radio"/> | <input type="radio"/> |
| 38. Finns det tillräckligt med plats i vardagsrummet för att manövrera en rullstol med hjälpare?                                                                                              | <input type="radio"/> | <input type="radio"/> | <input type="radio"/> |
| 39. Kan de boende ha utblick över natur eller bostadsområde från vardagsrummet? (även personer som sitter i rullstol)                                                                         | <input type="radio"/> | <input type="radio"/> | <input type="radio"/> |
| 40. Är det möjligt att se vardagliga inomhusaktiviteter inomhus från vardagsrummet? (t ex personal som förbereder mat eller andra hushållssysslor)                                            | <input type="radio"/> | <input type="radio"/> | <input type="radio"/> |
| 41. Finns åtkomst till internet i vardagsrummet?                                                                                                                                              | <input type="radio"/> | <input type="radio"/> | <input type="radio"/> |
| 42. Har vardagsrummet god akustik och ljuddämpning som främjar samvaro, lugn och ro?                                                                                                          | <input type="radio"/> | <input type="radio"/> | <input type="radio"/> |
| 43. Är det god ventilation i vardagsrummet?                                                                                                                                                   | <input type="radio"/> | <input type="radio"/> | <input type="radio"/> |
| 44. Finns det tillräckligt med dagsljusinsläpp i vardagsrummet?                                                                                                                               | <input type="radio"/> | <input type="radio"/> | <input type="radio"/> |

## Kök/matplats

|                                                                                                                                                                             |                       |                       |                       |
|-----------------------------------------------------------------------------------------------------------------------------------------------------------------------------|-----------------------|-----------------------|-----------------------|
| 45. Finns det en separat matplats för de boende?                                                                                                                            | <input type="radio"/> | <input type="radio"/> | <input type="radio"/> |
| 46. Kan personer som har andra ärenden än att besöka anhöriga, nå utrymmen utan att behöva passera igenom köket/matplatsen? (t ex fastighetsskötare, brevbärare, studenter) | <input type="radio"/> | <input type="radio"/> | <input type="radio"/> |
| 47. Är trygghets/säkerhetsanordningar diskret integrerade i miljön? (t ex störande anslagstavlor, blinkande larm, kala lysrör)                                              | <input type="radio"/> | <input type="radio"/> | <input type="radio"/> |
| 48. Är köket/matplatsen utformad så att den ger en karaktär av bostad och hem? (material, storlek, form)                                                                    | <input type="radio"/> | <input type="radio"/> | <input type="radio"/> |

## Kök/matplats

|                                                                                                                                                                                                  |                       |                       |                       |
|--------------------------------------------------------------------------------------------------------------------------------------------------------------------------------------------------|-----------------------|-----------------------|-----------------------|
| 49. Är golven halksäkra? (viss strävhet, jämn yta utan springor, material med liknande friktion intill varandra)                                                                                 | <input type="radio"/> | <input type="radio"/> | <input type="radio"/> |
| 50. Är sittplatserna säkra och stödjande för sköra äldre personer? (t ex inga vassa ytor, stabila armstöd, robusta ben, låg sitthöjd)                                                            | <input type="radio"/> | <input type="radio"/> | <input type="radio"/> |
| 51. Är köket/matplatsen säkert utformad för sköra äldre personer? (t ex skydd på varma/vassa/glasade ytor, en golvnivå eller tydlig övergång från en nivå till en annan, fönster med fönsterlås) | <input type="radio"/> | <input type="radio"/> | <input type="radio"/> |
| 52. Är köket/matplatsen tillgänglig för personer med funktionsnedsättningar?                                                                                                                     | <input type="radio"/> | <input type="radio"/> | <input type="radio"/> |
| 53. Finns det tillräckligt med plats i kök/matplats att manövrera en rullstol med hjälpare?                                                                                                      | <input type="radio"/> | <input type="radio"/> | <input type="radio"/> |
| 54. Kan alla boende inom boendeenheten äta samtidigt?                                                                                                                                            | <input type="radio"/> | <input type="radio"/> | <input type="radio"/> |
| 55. Är matborden utformade så att de bidrar till social samvaro? (ca max sex personer per bord)                                                                                                  | <input type="radio"/> | <input type="radio"/> | <input type="radio"/> |
| 56. Är det god ventilation i kök/matplats?                                                                                                                                                       | <input type="radio"/> | <input type="radio"/> | <input type="radio"/> |
| 57. Är köket/matplatsen trivsamt upplyst? (t ex dagsljus eller belysning som är god utan att blända)                                                                                             | <input type="radio"/> | <input type="radio"/> | <input type="radio"/> |

## Allmänt badrum

|                                                                                                                   |                       |                       |                       |
|-------------------------------------------------------------------------------------------------------------------|-----------------------|-----------------------|-----------------------|
| 58. Är badrummet placerat så att användaren kan vara privat med tanke på andra boende som rör sig inom byggnaden? | <input type="radio"/> | <input type="radio"/> | <input type="radio"/> |
| 59. Kan man vara privat utan risk för lyhördhet?                                                                  | <input type="radio"/> | <input type="radio"/> | <input type="radio"/> |
| 60. Är badrummet insynsskyddat?                                                                                   | <input type="radio"/> | <input type="radio"/> | <input type="radio"/> |

## Allmänt badrum

|                                                                                                                                                                                                              |                       |                       |                       |
|--------------------------------------------------------------------------------------------------------------------------------------------------------------------------------------------------------------|-----------------------|-----------------------|-----------------------|
| 61. Finns möjlighet till avskildhet inne i badrummet? (alkov, skärm, duschdraperi)                                                                                                                           | <input type="radio"/> | <input type="radio"/> | <input type="radio"/> |
| 62. Är badrummet utformat så att det ger en karaktär av bostad och hem? (t ex medicinteknisk utrustning och anpassning för funktionsnedsättning är diskret)                                                  | <input type="radio"/> | <input type="radio"/> | <input type="radio"/> |
| 63. Finns öppningsbara WC-lås till badrummet?                                                                                                                                                                | <input type="radio"/> | <input type="radio"/> | <input type="radio"/> |
| 64. Finns det larmanordning i det allmänna badrummet?                                                                                                                                                        | <input type="radio"/> | <input type="radio"/> | <input type="radio"/> |
| 65. Är golvet halksäkert? (viss strävhet, jämn yta utan springor, material med liknande friktion intill varandra)                                                                                            | <input type="radio"/> | <input type="radio"/> | <input type="radio"/> |
| 66. Är badrummet säkert utformat för sköra äldre personer? (t ex skydd på varma/vassa/glasade ytor, en golvnivå eller tydlig övergång från en nivå till en annan, inga fönster eller fönster med fönsterlås) | <input type="radio"/> | <input type="radio"/> | <input type="radio"/> |
| 67. Finns automatisk dörröppnare eller automatisk skjutdörr? (automatisk dörröppnare bör vara försedd med markering av dörrens svepyta alternativt säkerhetssensor)                                          | <input type="radio"/> | <input type="radio"/> | <input type="radio"/> |
| 68. Är det allmänna badrummet utformat så att det kan användas av personer med funktionsnedsättningar?                                                                                                       | <input type="radio"/> | <input type="radio"/> | <input type="radio"/> |
| 69. Finns det fritt utrymme vid sidan av dörren så att personer i rullstol kan öppna badrumsdörren utan problem?                                                                                             | <input type="radio"/> | <input type="radio"/> | <input type="radio"/> |
| 70. Finns det tillräckligt med plats i det allmänna badrummet för lyftanordning eller att manövrera en rullstol med hjälpare?                                                                                | <input type="radio"/> | <input type="radio"/> | <input type="radio"/> |
| 71. Är det tydliga kontraster mellan badrumsinredningen och dess bakgrund?                                                                                                                                   | <input type="radio"/> | <input type="radio"/> | <input type="radio"/> |
| 72. Finns uttag för rakapparat inom räckhåll från rullstol? (ej högre än 1,1 m samt ej placerat i hörn)                                                                                                      | <input type="radio"/> | <input type="radio"/> | <input type="radio"/> |
| 73. Finns det tillgång till hygienartiklar för att garantera handhygien? (t ex tvålumpar, handsprit, handtork/handdukar?)                                                                                    | <input type="radio"/> | <input type="radio"/> | <input type="radio"/> |

## Allmänt badrum

|                                                                                         |                       |                       |                       |
|-----------------------------------------------------------------------------------------|-----------------------|-----------------------|-----------------------|
| 74. Finns det speglar?                                                                  | <input type="radio"/> | <input type="radio"/> | <input type="radio"/> |
| 75. Är det god ventilation i badrummet?                                                 | <input type="radio"/> | <input type="radio"/> | <input type="radio"/> |
| 76. Är badrummet trivsamt upplyst? (t ex dagsljus eller god belysning som inte bländar) | <input type="radio"/> | <input type="radio"/> | <input type="radio"/> |

## Enskilda lägenheter

|                                                                                                                                            |                       |                       |                       |
|--------------------------------------------------------------------------------------------------------------------------------------------|-----------------------|-----------------------|-----------------------|
| 77. Finns det ringklocka eller dylikt vid entrén/dörren?                                                                                   | <input type="radio"/> | <input type="radio"/> | <input type="radio"/> |
| 78. Är entrédörren utformad med tydliga kontraster?                                                                                        | <input type="radio"/> | <input type="radio"/> | <input type="radio"/> |
| 79. Är lås och handtag placerade och utformade så att de kan användas av personer med nedsatt rörelse- och orienteringsförmåga?            | <input type="radio"/> | <input type="radio"/> | <input type="radio"/> |
| 80. Finns det tillräckligt med plats i entrén/hallen att manövrera en rullstol med hjälpare?                                               | <input type="radio"/> | <input type="radio"/> | <input type="radio"/> |
| 81. Kan kapphyllan anpassas både för personer som står och sitter?                                                                         | <input type="radio"/> | <input type="radio"/> | <input type="radio"/> |
| 82. Kan den boende vara privat i sin lägenhet utan risk för lyhörddhet? (beakta intilliggande rum)                                         | <input type="radio"/> | <input type="radio"/> | <input type="radio"/> |
| 83. Är ljudmiljön behaglig inne i lägenheten? (så att det går att utestänga ljud från t ex korridor intilliggande rum eller utomhusmiljön) | <input type="radio"/> | <input type="radio"/> | <input type="radio"/> |
| 84. Är trygghets/säkerhetsanordningar diskret integrerade i miljön? (t ex störande anslagstavlor, blinkande larm, kala lysrör)             | <input type="radio"/> | <input type="radio"/> | <input type="radio"/> |
| 85. Är lägenheten utformad så att den boende kan placera personliga föremål? (t ex föremål på vägghyllor, tavlor, speglar, golvföremål)    | <input type="radio"/> | <input type="radio"/> | <input type="radio"/> |
| 86. Finns det uttag för TV?                                                                                                                | <input type="radio"/> | <input type="radio"/> | <input type="radio"/> |
| 87. Finns det telefonjack i lägenheten?                                                                                                    | <input type="radio"/> | <input type="radio"/> | <input type="radio"/> |

## Enskilda lägenheter

|                                                                                                                                                                                                               |                       |                       |                       |
|---------------------------------------------------------------------------------------------------------------------------------------------------------------------------------------------------------------|-----------------------|-----------------------|-----------------------|
| 88. Finns åtkomst till internet i lägenheten?                                                                                                                                                                 | <input type="radio"/> | <input type="radio"/> | <input type="radio"/> |
| 89. Finns det något värdeskåp i lägenheten?                                                                                                                                                                   | <input type="radio"/> | <input type="radio"/> | <input type="radio"/> |
| 90. Kan den boende se ut mot natur eller bostadsområde från lägenheten?                                                                                                                                       | <input type="radio"/> | <input type="radio"/> | <input type="radio"/> |
| 91. Kan personer som sitter i rullstol se ut genom lägenhetens fönster? (fönsterbröstning max 0,80 m över golv)                                                                                               | <input type="radio"/> | <input type="radio"/> | <input type="radio"/> |
| 92. Kan den boende se ut genom fönstret från sängen?                                                                                                                                                          | <input type="radio"/> | <input type="radio"/> | <input type="radio"/> |
| 93. Finns det tillräckligt med dagsljusinsläpp i den enskilda lägenheten?                                                                                                                                     | <input type="radio"/> | <input type="radio"/> | <input type="radio"/> |
| 94. Finns anordningar för att kontrollera dagsljuset i lägenheten? (t ex persienner, markiser, gardiner)                                                                                                      | <input type="radio"/> | <input type="radio"/> | <input type="radio"/> |
| 95. Kan den boende själv reglera belysningen? (inkluderat person med funktionsnedsättning)                                                                                                                    | <input type="radio"/> | <input type="radio"/> | <input type="radio"/> |
| 96. Är radiatorer och värmereglage placerade och utformade så att den boende själv kan reglera värmen? (inkluderat person med funktionsnedsättning)                                                           | <input type="radio"/> | <input type="radio"/> | <input type="radio"/> |
| 97. Kan den boende själv använda luftkonditionering eller vädra? (inkluderat person med funktionsnedsättning)                                                                                                 | <input type="radio"/> | <input type="radio"/> | <input type="radio"/> |
| 98. Är det god ventilation i den enskilda lägenheten utan att man behöver öppna fönster och vädra?                                                                                                            | <input type="radio"/> | <input type="radio"/> | <input type="radio"/> |
| 99. Finns det utrymme för samvaro och måltider i lägenheten?                                                                                                                                                  | <input type="radio"/> | <input type="radio"/> | <input type="radio"/> |
| 100. Är köket utrustat med köksinredning? (kylskåp, skåputrustning, kokplatta och diskbänk, plats för kaffebruggare) Skatta 1=ja om det finns åtminstone kylskåp och plats för kaffebruggare el. vattenkokare | <input type="radio"/> | <input type="radio"/> | <input type="radio"/> |
| 101. Är köket/pentryt utformat så att det inbjuder till gemensamma aktiviteter?                                                                                                                               | <input type="radio"/> | <input type="radio"/> | <input type="radio"/> |



## Enskilda lägenheter

|                                                                                                                                                                                             |                       |                       |                       |
|---------------------------------------------------------------------------------------------------------------------------------------------------------------------------------------------|-----------------------|-----------------------|-----------------------|
| 102. Är köket/pentryt utformat med arbets- och förvaringsytor i olika höjder samt plats för mer än en person?                                                                               | <input type="radio"/> | <input type="radio"/> | <input type="radio"/> |
| 103. Finns det tillräckligt med plats i lägenheten att manövrera en rullstol med hjälpare?                                                                                                  | <input type="radio"/> | <input type="radio"/> | <input type="radio"/> |
| 104. Är lägenheten fri från trösklar invändigt?                                                                                                                                             | <input type="radio"/> | <input type="radio"/> | <input type="radio"/> |
| 105. Är golven halksäkra? (viss strävhet, jämn yta utan springor, material med liknande friktion intill varandra)                                                                           | <input type="radio"/> | <input type="radio"/> | <input type="radio"/> |
| 106. Är lägenheten säkert utformad för sköra äldre personer? (t ex skydd på varma/vassa/glasade ytor, en golvnivå eller tydlig övergång från en nivå till en annan, fönster med fönsterlås) | <input type="radio"/> | <input type="radio"/> | <input type="radio"/> |
| 107. Finns innerdörrar i kontrasterande färg?                                                                                                                                               | <input type="radio"/> | <input type="radio"/> | <input type="radio"/> |
| 108. Är det lätt för den boende att hitta till hygienrummet från sin säng?                                                                                                                  | <input type="radio"/> | <input type="radio"/> | <input type="radio"/> |
| 109. Finns utrymme för sängbord intill sängen?                                                                                                                                              | <input type="radio"/> | <input type="radio"/> | <input type="radio"/> |
| 110. Är sovrummet mörkt på natten?                                                                                                                                                          | <input type="radio"/> | <input type="radio"/> | <input type="radio"/> |
| 111. Finns det någon nattbelysning eller sänglampa?                                                                                                                                         | <input type="radio"/> | <input type="radio"/> | <input type="radio"/> |
| 112. Finns det larmanordning i lägenheten?                                                                                                                                                  | <input type="radio"/> | <input type="radio"/> | <input type="radio"/> |
| 113. Är larmsystemet utformat så att det inte är störande inne i lägenheten nattetid?                                                                                                       | <input type="radio"/> | <input type="radio"/> | <input type="radio"/> |
| 114. Finns det fritt utrymme vid sidan av dörren så att personer i rullstol kan öppna hygienrumsdörren utan problem?                                                                        | <input type="radio"/> | <input type="radio"/> | <input type="radio"/> |
| 115. Är dörren till hygienrummet utåtgående eller finns skjutdörr som går in i väggen?                                                                                                      | <input type="radio"/> | <input type="radio"/> | <input type="radio"/> |
| 116. Finns öppningsbara WC-lås till hygienrummet?                                                                                                                                           | <input type="radio"/> | <input type="radio"/> | <input type="radio"/> |

## Enskilda lägenheter

|                                                                                                                                                                                               |                       |                       |                       |
|-----------------------------------------------------------------------------------------------------------------------------------------------------------------------------------------------|-----------------------|-----------------------|-----------------------|
| 117. Finns det larmanordning i hygienrummet?                                                                                                                                                  | <input type="radio"/> | <input type="radio"/> | <input type="radio"/> |
| 118. Är hygienrummet säkert utformat för sköra äldre personer? (t ex skydd på varma/vassa/glasade ytor, en golvnivå eller tydlig övergång från en nivå till en annan, fönster med fönsterlås) | <input type="radio"/> | <input type="radio"/> | <input type="radio"/> |
| 119. Är golvet halksäkert? (viss strävhet, jämn yta utan springor, material med liknande friktion intill varandra)                                                                            | <input type="radio"/> | <input type="radio"/> | <input type="radio"/> |
| 120. Är badrumsgolvet utformat så att det kan användas av de boende utan risk för att vatten rinner ut från duschplatsen?                                                                     | <input type="radio"/> | <input type="radio"/> | <input type="radio"/> |
| 121. Är hygienrummet utformat efter den boendes behov? (t ex plats för eventuella hjälpmedel, utrymme för hjälpare)                                                                           | <input type="radio"/> | <input type="radio"/> | <input type="radio"/> |
| 122. Uppfyller stödfunktioner i hygienrummet den boendes behov? (t ex stödhandtag, armstöd, taklyft, anordningar för att justera höjd)                                                        | <input type="radio"/> | <input type="radio"/> | <input type="radio"/> |
| 123. Finns det tillgång till hygienartiklar för att garantera handhygien (t ex tvålumpar, handsprit, handtork/handdukar?)                                                                     | <input type="radio"/> | <input type="radio"/> | <input type="radio"/> |
| 124. Finns uttag för rakapparat inom räckhåll från rullstol? (ej högre än 1,1 m samt ej placerat i hörn)                                                                                      | <input type="radio"/> | <input type="radio"/> | <input type="radio"/> |
| 125. Är toalettpappersrullen placerad så att den lätt kan ses och nås från toalettstolen?                                                                                                     | <input type="radio"/> | <input type="radio"/> | <input type="radio"/> |
| 126. Finns förvaringsutrymme i eller i anslutning till hygienrummet för hygien- och förbrukningsartiklar?                                                                                     | <input type="radio"/> | <input type="radio"/> | <input type="radio"/> |
| 127. Är det god ventilation i hygienrummet?                                                                                                                                                   | <input type="radio"/> | <input type="radio"/> | <input type="radio"/> |

## Övergripande byggnadsutformning

|                                                                              |                       |                       |                       |
|------------------------------------------------------------------------------|-----------------------|-----------------------|-----------------------|
| 128. Är äldreboendet utformat så att det är lätt att hitta?                  | <input type="radio"/> | <input type="radio"/> | <input type="radio"/> |
| 129. Är äldreboendet tillgängligt med tanke på avstånd och hinder?           | <input type="radio"/> | <input type="radio"/> | <input type="radio"/> |
| 130. Är äldreboendet utformat så att det påminner om ett vanligt bostadshus? | <input type="radio"/> | <input type="radio"/> | <input type="radio"/> |

## Övergripande byggnadsutformning

|                                                                                                                                               |                       |                       |                       |
|-----------------------------------------------------------------------------------------------------------------------------------------------|-----------------------|-----------------------|-----------------------|
| 131. Är alla enskilda lägenheter tillräckligt skyddade från insyn av passerande?                                                              | <input type="radio"/> | <input type="radio"/> | <input type="radio"/> |
| 132. Är alla vardagsrum tillräckligt skyddade från insyn av passerande?                                                                       | <input type="radio"/> | <input type="radio"/> | <input type="radio"/> |
| 133. Är boendet utformat så att de flesta enskilda lägenheter får in maximalt med dagsljus?                                                   | <input type="radio"/> | <input type="radio"/> | <input type="radio"/> |
| 134. Har alla egen lägenhet?                                                                                                                  | <input type="radio"/> | <input type="radio"/> | <input type="radio"/> |
| 135. Finns det möjlighet att utforma lägenheten så att två personer kan ha delat boende om de så önskar? (t ex äkta makar)                    | <input type="radio"/> | <input type="radio"/> | <input type="radio"/> |
| 136. Har man använt naturliga och hållbara material i byggnaden?                                                                              | <input type="radio"/> | <input type="radio"/> | <input type="radio"/> |
| 137. Är det en effektiv energianvändning i byggnaden med tanke på temperatur och luftkvalitet?                                                | <input type="radio"/> | <input type="radio"/> | <input type="radio"/> |
| 138. Har de boende tillgång till källsortering?                                                                                               | <input type="radio"/> | <input type="radio"/> | <input type="radio"/> |
| 139. Finns det någon besökstoilet som är utformad för personer med olika funktionsnedsättningar?                                              | <input type="radio"/> | <input type="radio"/> | <input type="radio"/> |
| 140. Finns något väder- och klimatskyddat utrymme utomhus avsett för rökning?                                                                 | <input type="radio"/> | <input type="radio"/> | <input type="radio"/> |
| 141. Finns det trygghetsboende inom eller intill äldreboendet?                                                                                | <input type="radio"/> | <input type="radio"/> | <input type="radio"/> |
| 142. Kan de boende fritt och obehindrat röra sig i byggnaden? (t ex användbara hissar på lämpliga platser, tillräckligt breda korridorer)     | <input type="radio"/> | <input type="radio"/> | <input type="radio"/> |
| 143. Finns det något utrymme som är lättillgängligt och tillräckligt stort så att boende från alla enheter kan samlas? (inklusive hjälpmedel) | <input type="radio"/> | <input type="radio"/> | <input type="radio"/> |
| 144. Finns det utrymme för mindre sammankomster? (t ex familjeträffar, högtider)                                                              | <input type="radio"/> | <input type="radio"/> | <input type="radio"/> |
| 145. Finns det något övernattningsrum för besökare?                                                                                           | <input type="radio"/> | <input type="radio"/> | <input type="radio"/> |

## Övergripande byggnadsutformning

|                                                                                                                                                                                |                       |                       |                       |
|--------------------------------------------------------------------------------------------------------------------------------------------------------------------------------|-----------------------|-----------------------|-----------------------|
| 146. Finns det något utrymme för fysisk aktivitet?                                                                                                                             | <input type="radio"/> | <input type="radio"/> | <input type="radio"/> |
| 147. Finns det något utrymme för fritidssysselsättning eller sociala aktiviteter?                                                                                              | <input type="radio"/> | <input type="radio"/> | <input type="radio"/> |
| 148. Finns det tillträde till dagcentral eller andra aktiviteter inom byggnaden för utomstående?                                                                               | <input type="radio"/> | <input type="radio"/> | <input type="radio"/> |
| 149. Kan utomstående nå dagcentral eller andra aktiviteter utan att behöva röra sig inom byggnaden?                                                                            | <input type="radio"/> | <input type="radio"/> | <input type="radio"/> |
| 150. Finns det tillgång till bord eller skrivbord för fritidssysslor någonstans i boendeenheten? (matbord räknas inte)                                                         | <input type="radio"/> | <input type="radio"/> | <input type="radio"/> |
| 151. Finns utblickar från olika delar av kommunikationsutrymmena? (inklusive utsikt över innergård)                                                                            | <input type="radio"/> | <input type="radio"/> | <input type="radio"/> |
| 152. Finns det någon referenspunkt i den yttre miljön? (t ex väg, närliggande byggnad, höga träd)                                                                              | <input type="radio"/> | <input type="radio"/> | <input type="radio"/> |
| 153. Är korridorerna utformade så att de boende kan ta sig fram utan att komma till en återvändsgränd?                                                                         | <input type="radio"/> | <input type="radio"/> | <input type="radio"/> |
| 154. Finns det någon gångslinga inom boendeenheten?                                                                                                                            | <input type="radio"/> | <input type="radio"/> | <input type="radio"/> |
| 155. Är kommunikationsutrymmena utformade så att det finns flera olika sittplatser att välja mellan beroende på vad man tänker göra? (t ex läsa tidningen, se ut över naturen) | <input type="radio"/> | <input type="radio"/> | <input type="radio"/> |
| 156. Är boendeenheten utformad så att de boende lättare kan hitta med hjälp av form, ljus eller färg? (t ex tydlig skyltning, färgkodning)                                     | <input type="radio"/> | <input type="radio"/> | <input type="radio"/> |
| 157. Är de gemensamma utrymmena utformade så att de känns igen utifrån användning?                                                                                             | <input type="radio"/> | <input type="radio"/> | <input type="radio"/> |
| 158. Är vägen mellan de enskilda lägenheterna och de allmänna utrymmena såsom vardagsrum, kök/matplats samt korridorer tydligt markerad genom skyltar eller färgkodning?       | <input type="radio"/> | <input type="radio"/> | <input type="radio"/> |

## Övergripande byggnadsutformning

|                                                                                                                                                                                    |                       |                       |                       |
|------------------------------------------------------------------------------------------------------------------------------------------------------------------------------------|-----------------------|-----------------------|-----------------------|
| 159. Är lägenhetsdörrarna markerade genom avvikande utformning? (t ex annat material)                                                                                              | <input type="radio"/> | <input type="radio"/> | <input type="radio"/> |
| 160. Är det färre än tre knutpunkter från den lägenhet som ligger längst bort, till vardagsrummet? (t ex korsning i kommunikationsutrymmen som den boende måste ta ställning till) | <input type="radio"/> | <input type="radio"/> | <input type="radio"/> |
| 161. Är det kortare än 15 meter till vardagsrummet från den lägenhet som ligger längst bort?                                                                                       | <input type="radio"/> | <input type="radio"/> | <input type="radio"/> |
| 162. Finns det sittplatser på vägen mellan lägenheterna och vardagsrummet?                                                                                                         | <input type="radio"/> | <input type="radio"/> | <input type="radio"/> |
| 163. Ligger lägenheterna åtskilda från allmänna transportstråk?                                                                                                                    | <input type="radio"/> | <input type="radio"/> | <input type="radio"/> |
| 164. Kan man röra sig överallt inom äldreboendet utan att behöva gå i trappor, alternativt trappor med max 0,15 m steghöjd och minst 0,26 m stegdjup?                              | <input type="radio"/> | <input type="radio"/> | <input type="radio"/> |
| 165. Finns det ledstänger i kommunikationsutrymmena?                                                                                                                               | <input type="radio"/> | <input type="radio"/> | <input type="radio"/> |
| 166. Är det tydliga kontraster mellan exempelvis ledstänger, dörrvred och bakgrund?                                                                                                | <input type="radio"/> | <input type="radio"/> | <input type="radio"/> |
| 167. Är korridorerna tillräckligt breda så att två personer i rullstol kan mötas? (minst 1,60 m)                                                                                   | <input type="radio"/> | <input type="radio"/> | <input type="radio"/> |
| 168. Är det minst 80 cm fritt passagemått i dörrar?                                                                                                                                | <input type="radio"/> | <input type="radio"/> | <input type="radio"/> |
| 169. Är dörrhandtagen utformade så att de kan användas av personer med nedsatt rörelse- och orienteringsförmåga eller nedsatt styrke- grip- eller precisionsförmåga?               | <input type="radio"/> | <input type="radio"/> | <input type="radio"/> |
| 170. Är ledstängerna säkert utformade för sköra äldre personer? (runda eller ovala så att det inte finns risk att fastna)                                                          | <input type="radio"/> | <input type="radio"/> | <input type="radio"/> |
| 171. Finns det kontrasterande ränder på första och sista steget i trappor samt på ramper och upphöjda trösklar?                                                                    | <input type="radio"/> | <input type="radio"/> | <input type="radio"/> |

## Övergripande byggnadsutformning

|                                                                                                                                                                                        |                       |                       |                       |
|----------------------------------------------------------------------------------------------------------------------------------------------------------------------------------------|-----------------------|-----------------------|-----------------------|
| 172. Är utrymningsvägar väl utformade med tydliga skyltar för att underlätta utrymning?                                                                                                | <input type="radio"/> | <input type="radio"/> | <input type="radio"/> |
| 173. Är byggnaden utformad så att det går att följa förändringar av dagsljuset under dygnet?                                                                                           | <input type="radio"/> | <input type="radio"/> | <input type="radio"/> |
| 174. Varierar belysningen mellan rummen på boendeenheten?                                                                                                                              | <input type="radio"/> | <input type="radio"/> | <input type="radio"/> |
| 175. Varierar temperaturen mellan rummen på boendeenheten?                                                                                                                             | <input type="radio"/> | <input type="radio"/> | <input type="radio"/> |
| 176. Finns det tillgång till telefon för personer med funktionsnedsättningar? (t ex personer i rullstol, personer med nedsatt arm- och handfunktion) (personalens telefon räknas inte) | <input type="radio"/> | <input type="radio"/> | <input type="radio"/> |
| 177. Finns det någon hörslinga?                                                                                                                                                        | <input type="radio"/> | <input type="radio"/> | <input type="radio"/> |
| 178. Har telefonerna inbyggd volymkontroll samt teleslinga?                                                                                                                            | <input type="radio"/> | <input type="radio"/> | <input type="radio"/> |
| 179. Finns det tillgång till telefon i avskildhet? (personalens telefon räknas inte)                                                                                                   | <input type="radio"/> | <input type="radio"/> | <input type="radio"/> |
| 180. Varierar temperaturen under dygnet?                                                                                                                                               | <input type="radio"/> | <input type="radio"/> | <input type="radio"/> |
| 181. Är korridorerna dagsljusbelysta via fönster eller takfönster?                                                                                                                     | <input type="radio"/> | <input type="radio"/> | <input type="radio"/> |
| 182. Är det särskilt upplyst vid hörn, passager eller andra viktiga funktioner? (avsiktligt starkare ljus från fönster och/eller elektrisk belysning)                                  | <input type="radio"/> | <input type="radio"/> | <input type="radio"/> |
| 183. Kan vårdpersonal ha överblick över allmänna utrymmen såsom vardagsrum, kök/matplats samt korridorer utan svårighet?                                                               | <input type="radio"/> | <input type="radio"/> | <input type="radio"/> |
| 184. Finns det larmanordning i korridorerna? (platser där personal kan tillkalla hjälp genom hela kommunikationsutrymmet)                                                              | <input type="radio"/> | <input type="radio"/> | <input type="radio"/> |
| 185. Är golven halksäkra i kommunikationsutrymmen? (viss strävhet, jämn yta utan springor, material med liknande friktion intill varandra)                                             | <input type="radio"/> | <input type="radio"/> | <input type="radio"/> |

## Övergripande byggnadsutformning

|                                                                                                                                                          |                       |                       |                       |
|----------------------------------------------------------------------------------------------------------------------------------------------------------|-----------------------|-----------------------|-----------------------|
| 186. Är radiatorer skyddade eller inställda på maxtemperatur för att minimera risk för brännskada?                                                       | <input type="radio"/> | <input type="radio"/> | <input type="radio"/> |
| 187. Går det att kontrollera vattentemperaturen med termostatblandare?                                                                                   | <input type="radio"/> | <input type="radio"/> | <input type="radio"/> |
| 188. Finns det möjlighet för de boende att själva tvätta kläder om de så önskar?                                                                         | <input type="radio"/> | <input type="radio"/> | <input type="radio"/> |
| 189. Finns någon plats inom byggnaden där de boende kan köpa kioskvaror som godis, läsk, glass eller toalettartiklar?                                    | <input type="radio"/> | <input type="radio"/> | <input type="radio"/> |
| 190. Kan de boende brygga kaffe/té i de allmänna utrymmena?                                                                                              | <input type="radio"/> | <input type="radio"/> | <input type="radio"/> |
| 191. Finns det ett badrum tillgängligt inom byggnaden så att de boende kan ta ett bad om de så önskar? (med eller utan assistans)                        | <input type="radio"/> | <input type="radio"/> | <input type="radio"/> |
| 192. Finns det någon snoezelen? (multi-sensoriskt rum med ljus, ljud, mjuka ytor)                                                                        | <input type="radio"/> | <input type="radio"/> | <input type="radio"/> |
| 193. Finns det förvaringsutrymme för hjälpmedel såsom rullstol eller rullator tillgängligt för den boende i eller i anslutning till den egna lägenheten? | <input type="radio"/> | <input type="radio"/> | <input type="radio"/> |
| 194. Finns det utrymme för de boende att vid behov förvara hjälpmedel nära vardagsrummet? (t ex rullstol, rullator)                                      | <input type="radio"/> | <input type="radio"/> | <input type="radio"/> |
| 195. Finns det förrådsutrymme där de boende kan förvara överblivna möbler eller säsongsutrustning?                                                       | <input type="radio"/> | <input type="radio"/> | <input type="radio"/> |
| 196. Bidrar utrymmet utanför de enskilda lägenheterna till personlig utformning? (plats utanför dörren, alkov el liknande)                               | <input type="radio"/> | <input type="radio"/> | <input type="radio"/> |
| 197. Ger inredningen karaktär av bostad och hem?                                                                                                         | <input type="radio"/> | <input type="radio"/> | <input type="radio"/> |

## Trädgård/utomhusområde

|                                                           |                       |                       |                       |
|-----------------------------------------------------------|-----------------------|-----------------------|-----------------------|
| 198. Är utomhusmiljön avskärmad med staket eller buskage? | <input type="radio"/> | <input type="radio"/> | <input type="radio"/> |
|-----------------------------------------------------------|-----------------------|-----------------------|-----------------------|

## Trädgård/utomhusområde

|                                                                                                                                                               |                       |                       |                       |
|---------------------------------------------------------------------------------------------------------------------------------------------------------------|-----------------------|-----------------------|-----------------------|
| 199. Är grindar/staket utformade så att de skyddar de boende från att av misstag förirra sig ut?                                                              | <input type="radio"/> | <input type="radio"/> | <input type="radio"/> |
| 200. Finns det något område med doftande blommor?                                                                                                             | <input type="radio"/> | <input type="radio"/> | <input type="radio"/> |
| 201. Finns det upphöjda rabatter?                                                                                                                             | <input type="radio"/> | <input type="radio"/> | <input type="radio"/> |
| 202. Kan trädgården/utomhusområdet användas av personer med funktionsnedsättningar? (ledstänger, ramper istället för trappsteg osv)                           | <input type="radio"/> | <input type="radio"/> | <input type="radio"/> |
| 203. Är alla ytor stabila och halkfria?                                                                                                                       | <input type="radio"/> | <input type="radio"/> | <input type="radio"/> |
| 204. Finns det någon gångslinga?                                                                                                                              | <input type="radio"/> | <input type="radio"/> | <input type="radio"/> |
| 205. Är trädgård/uteplats utformad så att den ger en karaktär av bostad och hem?                                                                              | <input type="radio"/> | <input type="radio"/> | <input type="radio"/> |
| 206. Finns det plats i trädgård/utomhusområde för boende att ha ett eget område om de så önskar? (t ex egen rabatt, egna blomkrukor)                          | <input type="radio"/> | <input type="radio"/> | <input type="radio"/> |
| 207. Har alla boende möjlighet till utomhusvistelse via trädgård, uteplats eller balkong?                                                                     | <input type="radio"/> | <input type="radio"/> | <input type="radio"/> |
| 208. Finns det valfrihet av flera trädgårdsområden? (t ex uteplats med sittplatser, gräsmatta, gångstig mellan landen)                                        | <input type="radio"/> | <input type="radio"/> | <input type="radio"/> |
| 209. Finns det någon anläggning/hjälpmiddel som underlättar för de boende kan hålla på med trädgårdssysslor? (t ex växthus, trädgårdsskjul, planteringslådor) | <input type="radio"/> | <input type="radio"/> | <input type="radio"/> |
| 210. Finns det separata sittplatser där man kan vara i fred?                                                                                                  | <input type="radio"/> | <input type="radio"/> | <input type="radio"/> |
| 211. Är trädgård/utomhusområde skyddat från trafik- och industriljud?                                                                                         | <input type="radio"/> | <input type="radio"/> | <input type="radio"/> |
| 212. Är marken belagd med gräs eller grus?                                                                                                                    | <input type="radio"/> | <input type="radio"/> | <input type="radio"/> |



### Trädgård/utomhusområde

|                                                                                                                                         |                       |                       |                       |
|-----------------------------------------------------------------------------------------------------------------------------------------|-----------------------|-----------------------|-----------------------|
| 213. Finns det sittplatser i trädgården eller utomhusområdet som kan användas av alla? (inkluderat personer med funktionsnedsättningar) | <input type="radio"/> | <input type="radio"/> | <input type="radio"/> |
| 214. Kan man se aktiviteter i omgivningen? (trafikerade gator, affärer, skola)                                                          | <input type="radio"/> | <input type="radio"/> | <input type="radio"/> |
| 215. Finns en variation av växter?                                                                                                      | <input type="radio"/> | <input type="radio"/> | <input type="radio"/> |

**S-SCEAM – Nordin S, Elf M, McKee K, Wijk H.**
